# Supplementary material for: Facile fabrication of paper-based analytical devices for rapid and highly selective colorimetric detection of cesium in environmental samples
Source: Royal Society of Chemistry journal article supplement (doi:10.1039/c7ra08444g), 2017-01-01
Supplement: c7ra08444g1.pdf [file c7ra08444g1.pdf]

## Supporting Information

### Facile fabrication of paper-based analytical devices for rapid and highly selective colorimetric detection of cesium in environmental samples

Sung-Min Kang,<sup>a,1</sup> Sung-Chan Jang,<sup>a,c,1</sup> Muruganantham Rethinasabapathy,<sup>a</sup> A. T. Ezhil Vilian,<sup>b</sup> Yuvaraj Haldorai,<sup>b</sup> Changhyun Roh,<sup>c,d,\*</sup> Young-Kyu Han,<sup>b,\*</sup> and Yun Suk Huh<sup>a,e,\*</sup>

<sup>a</sup> Department of Biological Engineering, Biohybrid Systems Research Center (BSRC), Inha University, 100 Inha-ro, Incheon, 22212, Republic of Korea.

<sup>b</sup> Department of Energy and Materials Engineering, Dongguk University-Seoul, Seoul, 04620, Republic of Korea.

<sup>c</sup> Biotechnology Research Division, Advanced Radiation Technology Institute (ARTI), Korea Atomic Energy Research Institute (KAERI), 29 Geungu-gil, Jeongeup, Jeonbuk, 56212, Republic of Korea.

<sup>d</sup> Radiation Biotechnology and Applied Radioisotope Science, University of Science Technology (UST), 217 Gajeong-ro, Daejeon, 34113, Republic of Korea.

<sup>e</sup> WCSL of Integrated Human Airway-on-a-Chip, Inha University, 100 Inha-ro, Incheon, 22212, Republic of Korea.

<sup>1</sup> These authors contributed equally to this work.

\* Corresponding authors. Tel.: +82 63 570 3133 (C. Roh), Tel.: +82 2 2260 4975 (Y.-K. Han),  
Tel.: +82 32 860 9177; fax: +82 32 872 4046 (Y. S. Huh).

E-mail addresses: [chroh@kaeri.re.kr](mailto:chroh@kaeri.re.kr) (C. Roh), [ykenegy@dongguk.edu](mailto:ykenegy@dongguk.edu) (Y.-K. Han),  
[yunsuk.huh@inha.ac.kr](mailto:yunsuk.huh@inha.ac.kr) (Y. S. Huh)

*Keywords:* Colorimetric detection, Cesium, On-site monitoring, Reusable sensor, Wearable diagnostic prototype

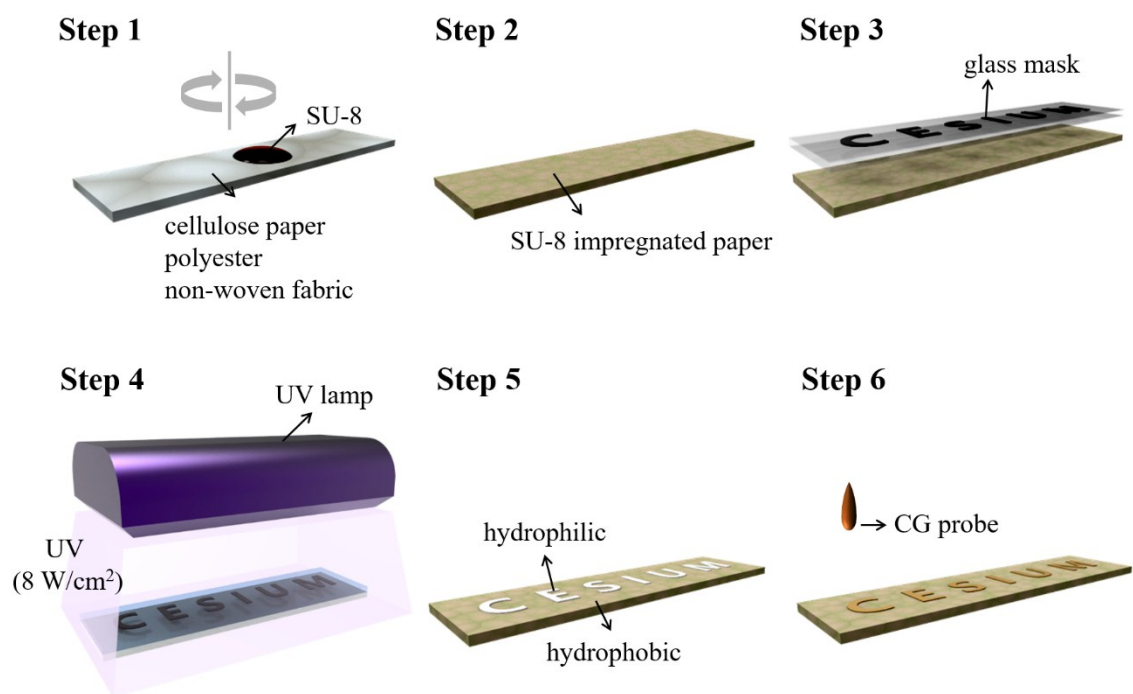

**Fig. S1.** Fabrication process for text-reporting colorimetric reusable sensor (CRS).

| Samples | Cs<br>(mg/L) | Image                                                                             | Level       |             |            |
|---------|--------------|-----------------------------------------------------------------------------------|-------------|-------------|------------|
|         |              |                                                                                   | R           | G           | B          |
| A       | 0            |  | 172.2 ± 4.7 | 178.6 ± 4.9 | 82.8 ± 3.4 |
|         | 0.2          |  | 190.8 ± 2.6 | 157.6 ± 2.6 | 71.9 ± 1.7 |
|         | 0.5          |  | 202.3 ± 8.9 | 130.6 ± 9.8 | 58.2 ± 6.5 |
| B       | 0            |  | 178.8 ± 5.2 | 173.6 ± 4.8 | 82.2 ± 2.7 |
|         | 0.2          |  | 185.4 ± 0.5 | 140.1 ± 0.4 | 64.4 ± 0.6 |
|         | 0.5          |  | 191.1 ± 2.1 | 131.1 ± 2.5 | 60.3 ± 3.2 |

**Fig. S2.** Real sample detection for digital images and statistical properties of RGB color distributions at different Cs ion concentrations.

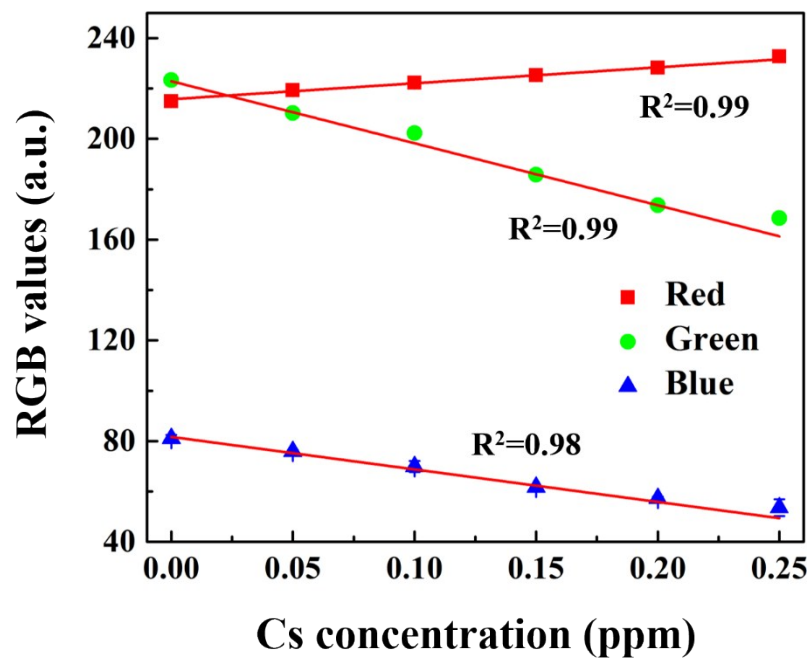

**Fig. S3.** Linear relationship between the RGB values and CRS in the presence of inactive cesium, covering the range from 0 to 0.25 mg/L. Each experiment was repeated five times.

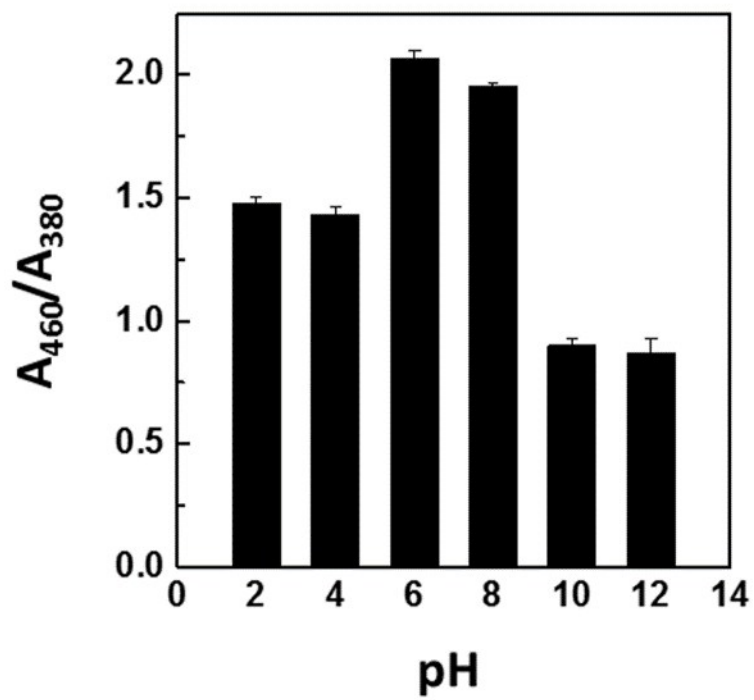

**Fig. S4.** Effect of pH in the presence of Cs.

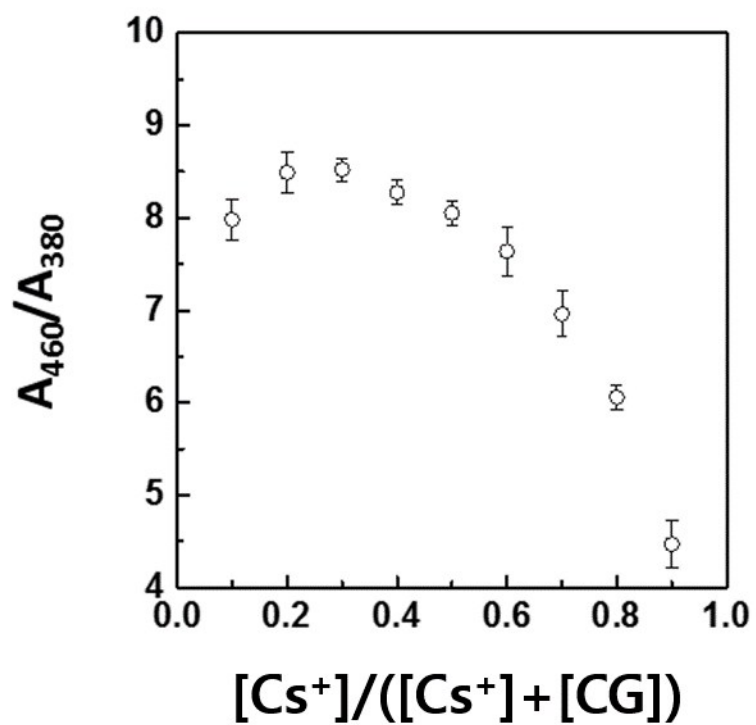

**Fig. S5.** Job's plot for the determination of the stoichiometry to CG chemo-indicator and Cs complex formation.
